# Supplementary material for: Photocatalytic water splitting employing a [Fe(CN)6]3−/4− redox mediator under visible light
Source: Royal Society of Chemistry journal article supplement (doi:10.1039/c9cy00100j), 2019-01-01
Supplement: c9cy00100j1.pdf [file c9cy00100j1.pdf]

## Electronic Supplementary Information for

### **Photocatalytic water splitting employing $[\text{Fe}(\text{CN})_6]^{3-/4-}$ redox mediator under visible light**

Yugo Miseki\* and Kazuhiro Sayama\*

*Advanced Functional Materials Team, Research Center for Photovoltaics (RCPV), National Institute of Advanced Industrial Science and Technology (AIST), Central 5, 1-1-1 Higashi, Tsukuba, Ibaraki 305-8565, Japan*

\*To whom the correspondence should be addressed.

E-mail: k.sayama@aist.go.jp, yugo-miseki@aist.go.jp

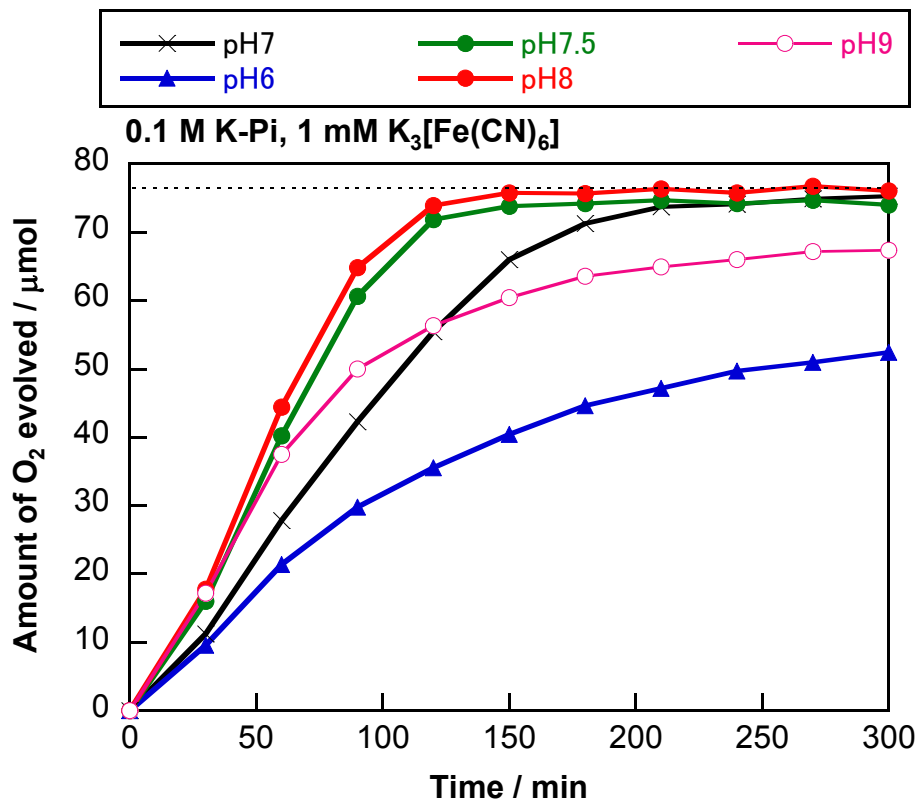

**Figure S1** Dependence of oxygen evolution reaction over Fe-H-Cs-WO<sub>3</sub> on the pH value.

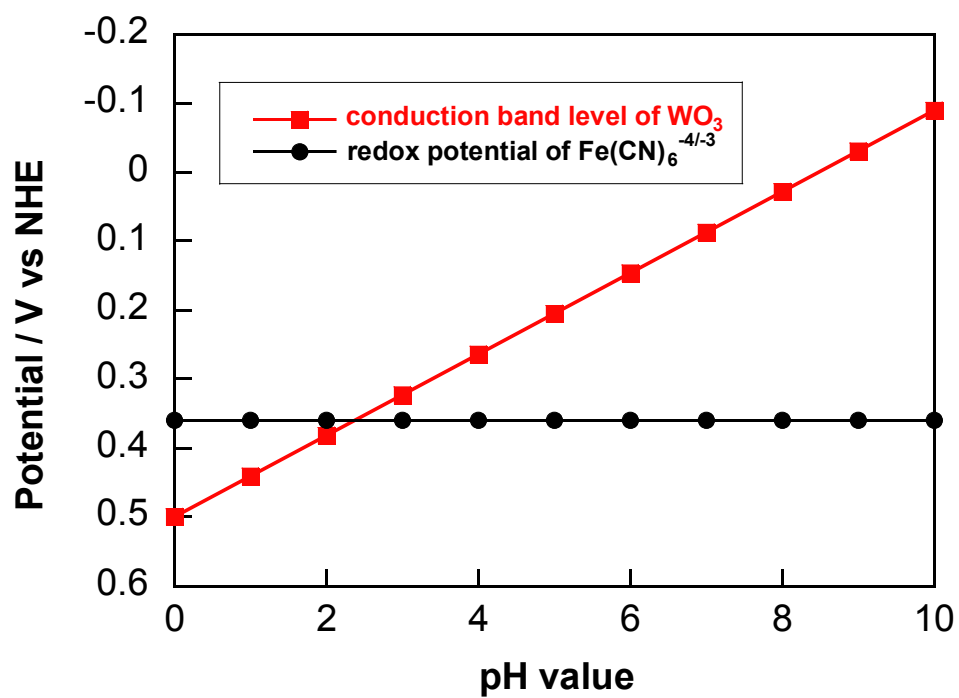

**Figure S2** Calculation result of the relationship between the conduction band level of  $\text{WO}_3$  and the redox potential of  $[\text{Fe}(\text{CN})_6]^{3-/4-}$ .
